# Supplementary material for: Potent Cytotoxic Peptides from the Australian Marine Sponge Pipestela candelabra
Source: PubMed Central journal article supplement (PMC4071583; doi:10.3390/md12063399), 2014-06-04
Supplement: marinedrugs-12-03399-s001.pdf [file marinedrugs-12-03399-s001.pdf]

## Supplementary Information

- Figure S1**  $^1\text{H}$  NMR Spectrum for milnamide E (**1**) in  $\text{DMSO-}d_6$
- Figure S2**  $^{13}\text{C}$  NMR Spectrum for milnamide E (**1**) in  $\text{DMSO-}d_6$
- Figure S3** gHSQCAD Spectrum for milnamide E (**1**) in  $\text{DMSO-}d_6$
- Figure S4** gHMBCAD Spectrum for milnamide E (**1**) in  $\text{DMSO-}d_6$
- Figure S5** gCOSY Spectrum for milnamide E (**1**) in  $\text{DMSO-}d_6$
- Figure S6** ROESY Spectrum for milnamide E (**1**) in  $\text{DMSO-}d_6$
- Figure S7**  $^1\text{H}$  NMR Spectrum for milnamide F (**2**) in  $\text{DMSO-}d_6$
- Figure S8** gHSQCAD Spectrum for milnamide F (**2**) in  $\text{DMSO-}d_6$
- Figure S9** gHMBCAD Spectrum for milnamide F (**2**) in  $\text{DMSO-}d_6$
- Figure S10** gCOSY Spectrum for milnamide F (**2**) in  $\text{DMSO-}d_6$
- Figure S11** ROESY Spectrum for milnamide F (**2**) in  $\text{DMSO-}d_6$
- Figure S12**  $^1\text{H}$  NMR Spectrum for milnamide G (**3**) in  $\text{DMSO-}d_6$
- Figure S13** gHSQCAD Spectrum for milnamide G (**3**) in  $\text{DMSO-}d_6$
- Figure S14** gHMBCAD Spectrum for milnamide G (**3**) in  $\text{DMSO-}d_6$
- Figure S15** gCOSY Spectrum for milnamide G (**3**) in  $\text{DMSO-}d_6$
- Figure S16** ROESY Spectrum for milnamide G (**3**) in  $\text{DMSO-}d_6$
- Figure S17**  $^1\text{H}$  NMR Spectrum for hemiasterlin D (**4**) in  $\text{DMSO-}d_6$
- Figure S18** gHSQCAD Spectrum for hemiasterlin D (**4**) in  $\text{DMSO-}d_6$
- Figure S19** gHMBCAD Spectrum for hemiasterlin D (**4**) in  $\text{DMSO-}d_6$
- Figure S20** gCOSY Spectrum for hemiasterlin D (**4**) in  $\text{DMSO-}d_6$
- Figure S21** ROESY Spectrum for hemiasterlin D (**4**) in  $\text{DMSO-}d_6$
- Figure S22** (+)-HRESIMS Spectrum for hemiasterlin D (**4**)
- Figure S23** LC/MS Analysis of Marfey's Derivatives of compounds **1–4**
- Figure S24** CD Spectra and Specific Rotations of Compounds **1–3** and **5–7**
- Figure S25** Photographs of the sponges *Pipestela candelabra*

**Figure S1.**  $^1\text{H}$  NMR Spectrum for milnamide E (**1**) in  $\text{DMSO-}d_6$ .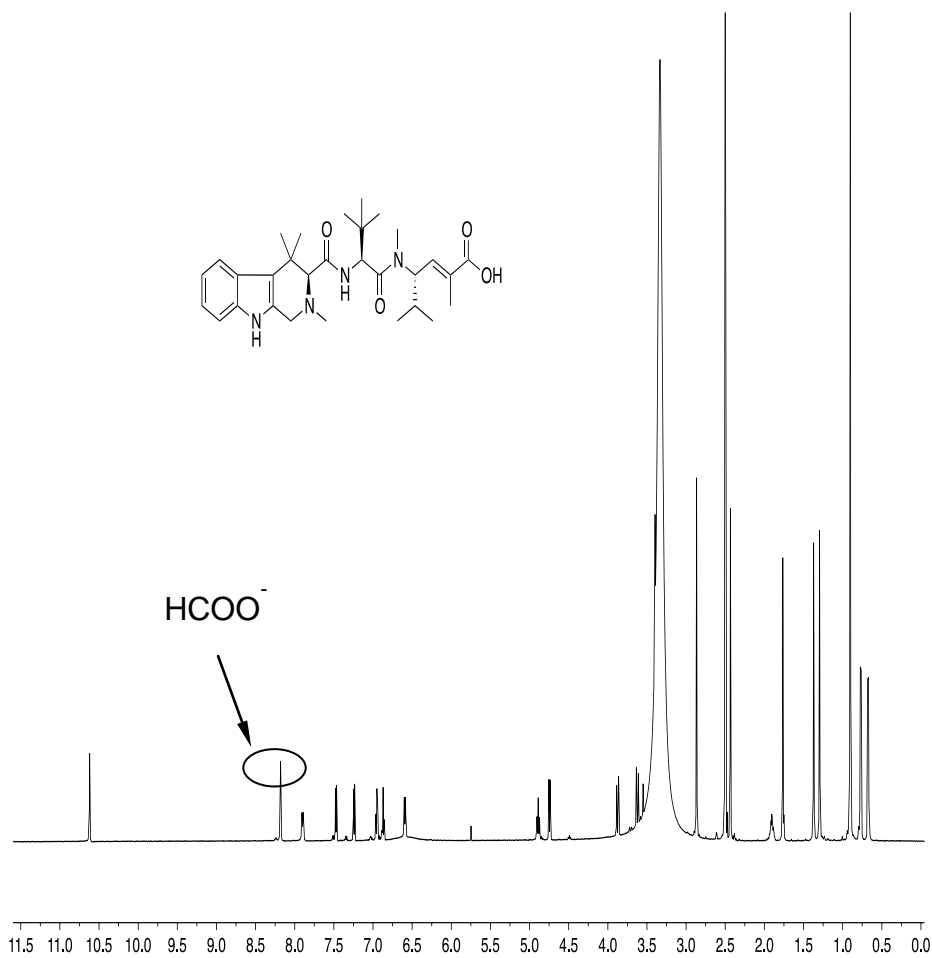**Figure S2.**  $^{13}\text{C}$  NMR Spectrum for milnamide E (**1**) in  $\text{DMSO-}d_6$ .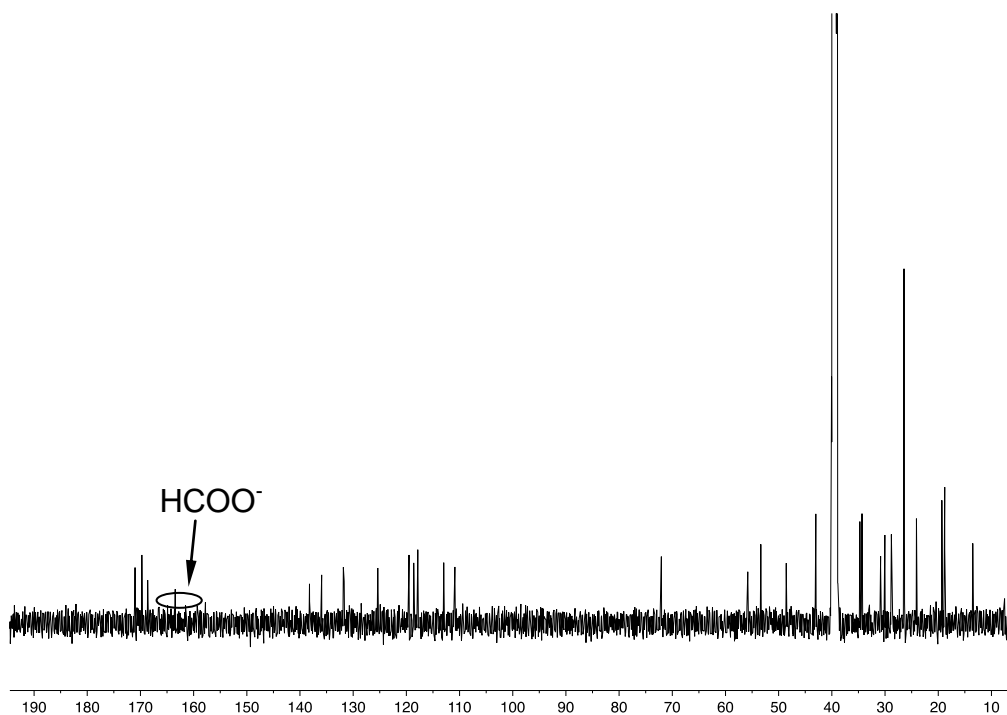

**Figure S3.** gHSQCAD Spectrum for milnamide E (1) in DMSO- $d_6$ .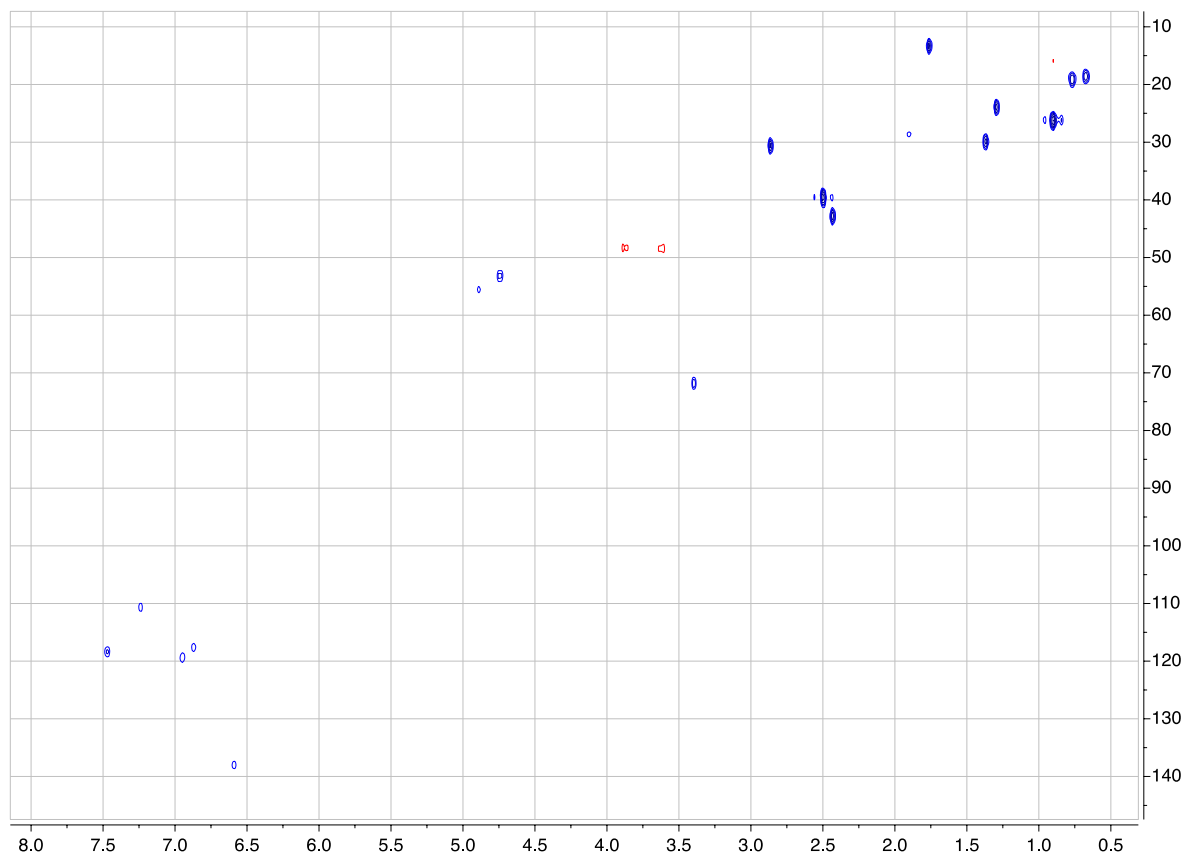**Figure S4.** gHMBCAD Spectrum for milnamide E (1) in DMSO- $d_6$ .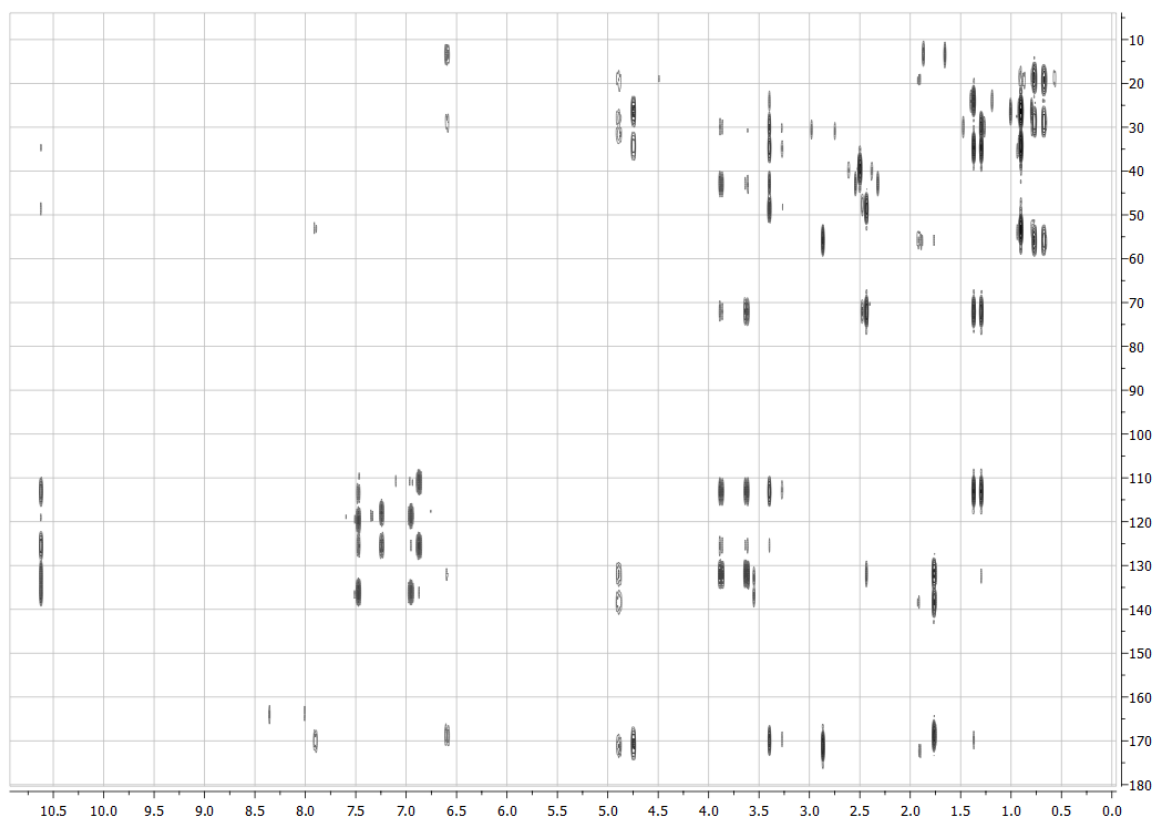

**Figure S5.** gCOSY Spectrum for milnamide E (1) in DMSO- $d_6$ .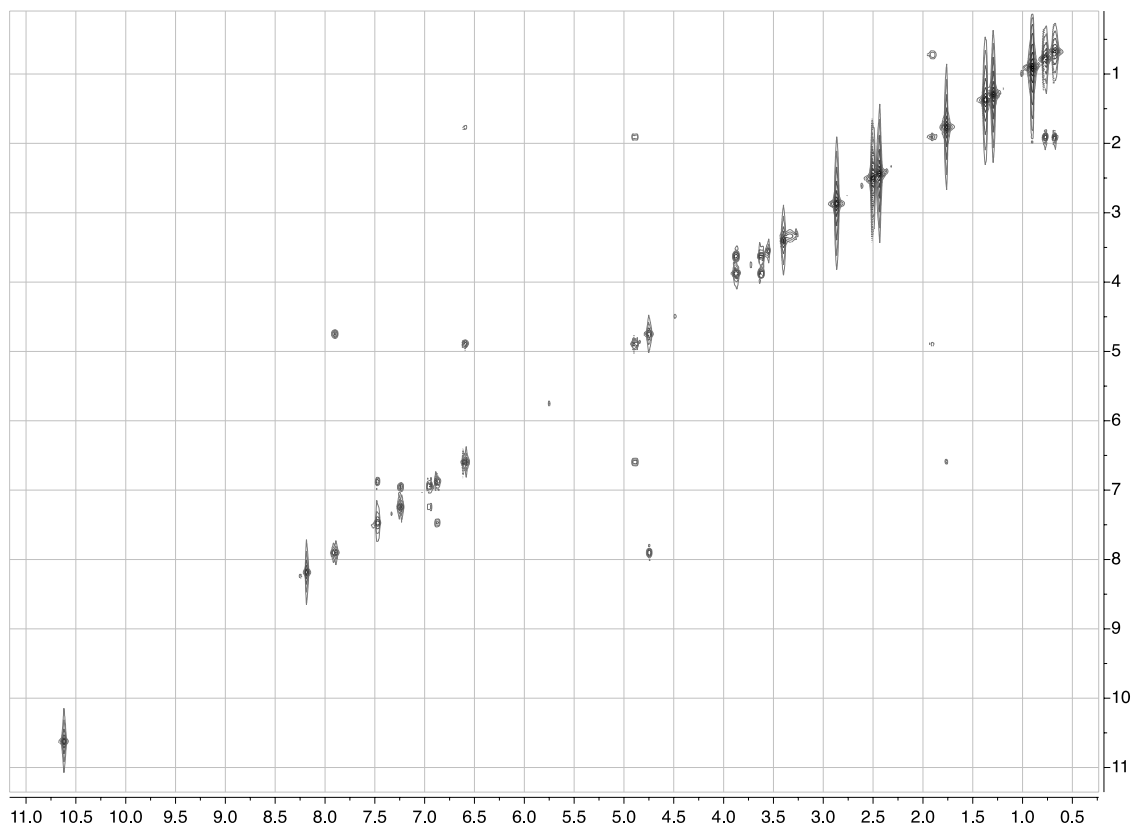**Figure S6.** ROESY Spectrum for milnamide E (1) in DMSO- $d_6$ .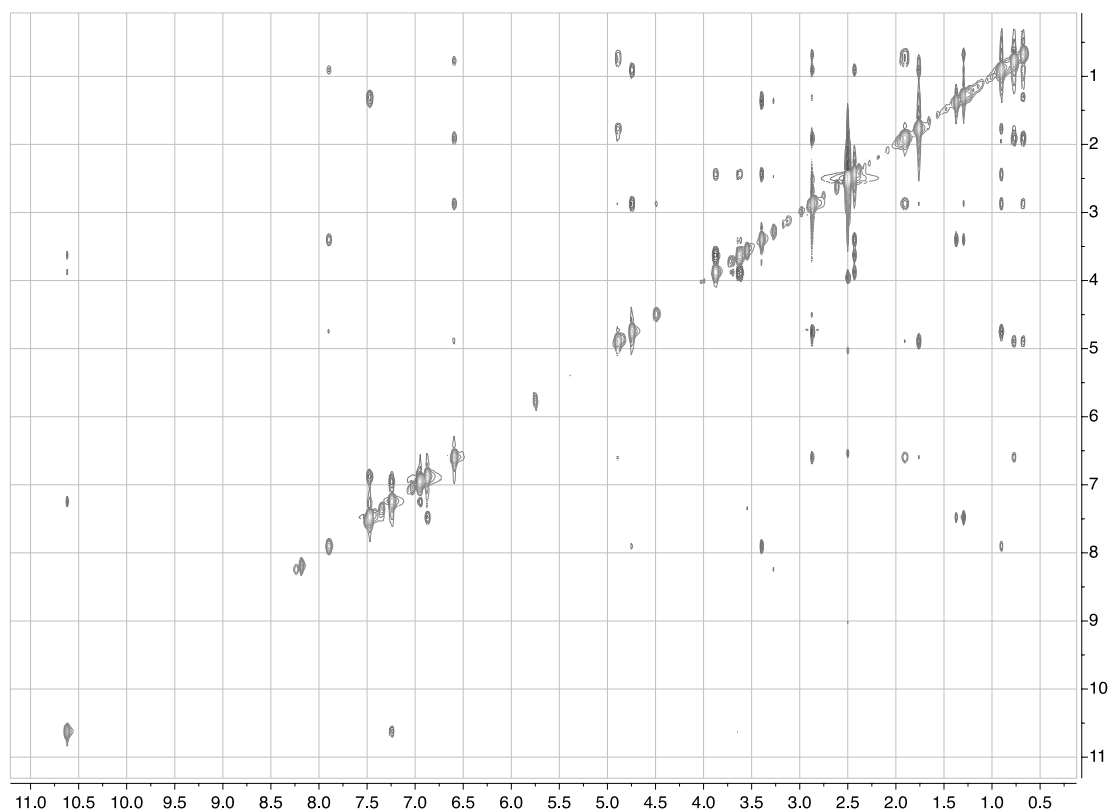

**Figure S7.**  $^1\text{H}$  NMR Spectrum for milnamide F (2) in  $\text{DMSO-}d_6$ .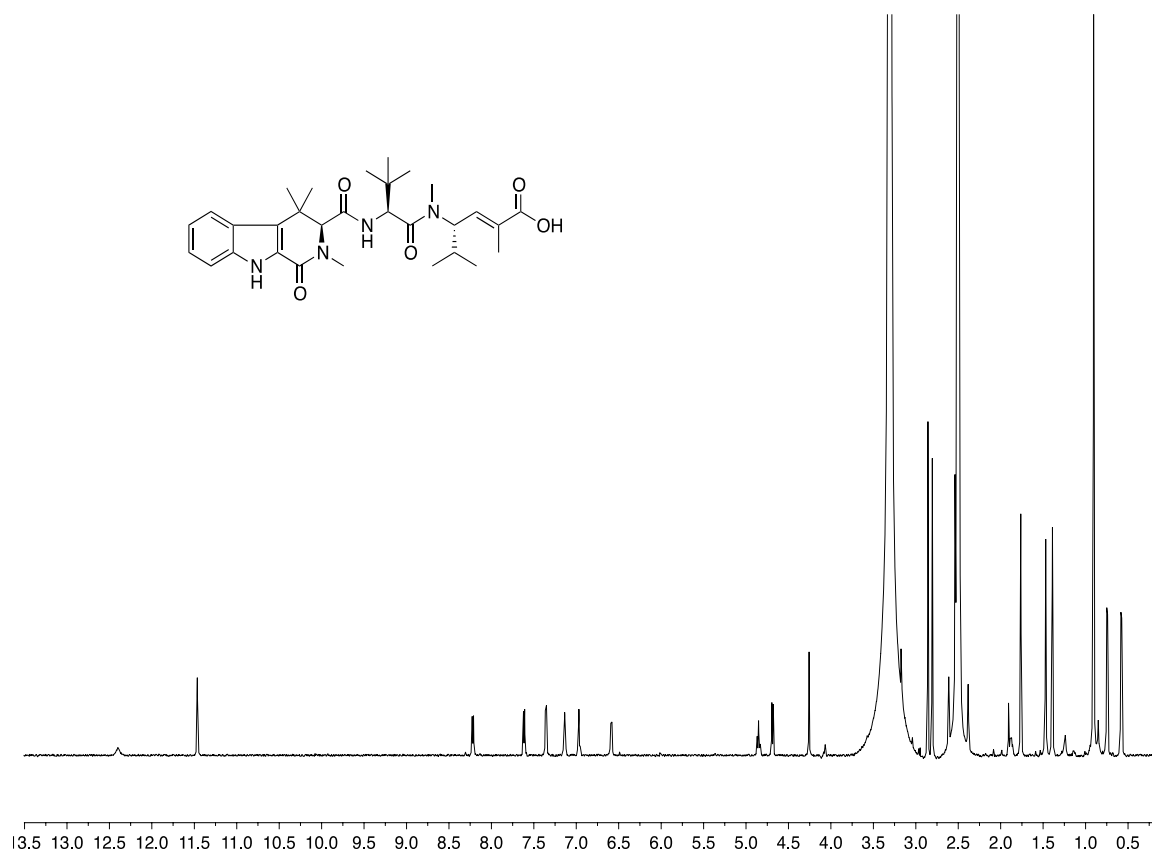**Figure S8.** gHSQCAD Spectrum for milnamide F (2) in  $\text{DMSO-}d_6$ .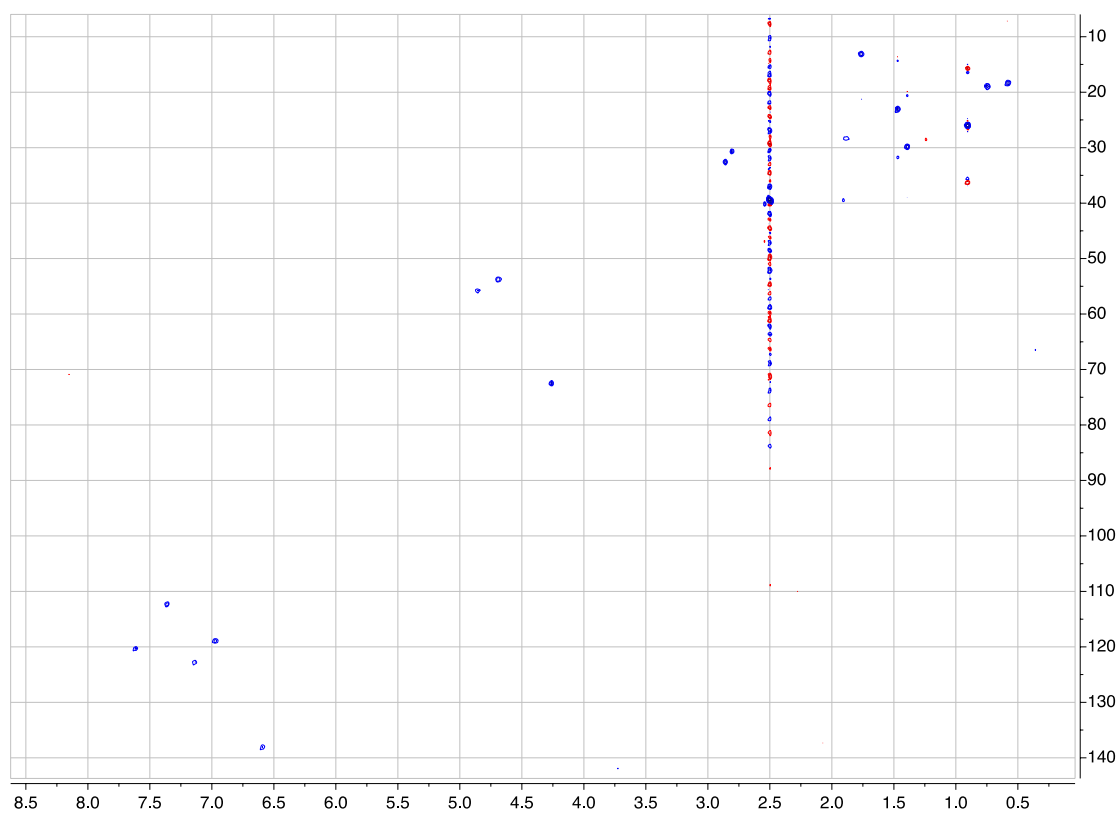

**Figure S9.** gHMBCAD Spectrum for milnamide F (2) in DMSO- $d_6$ .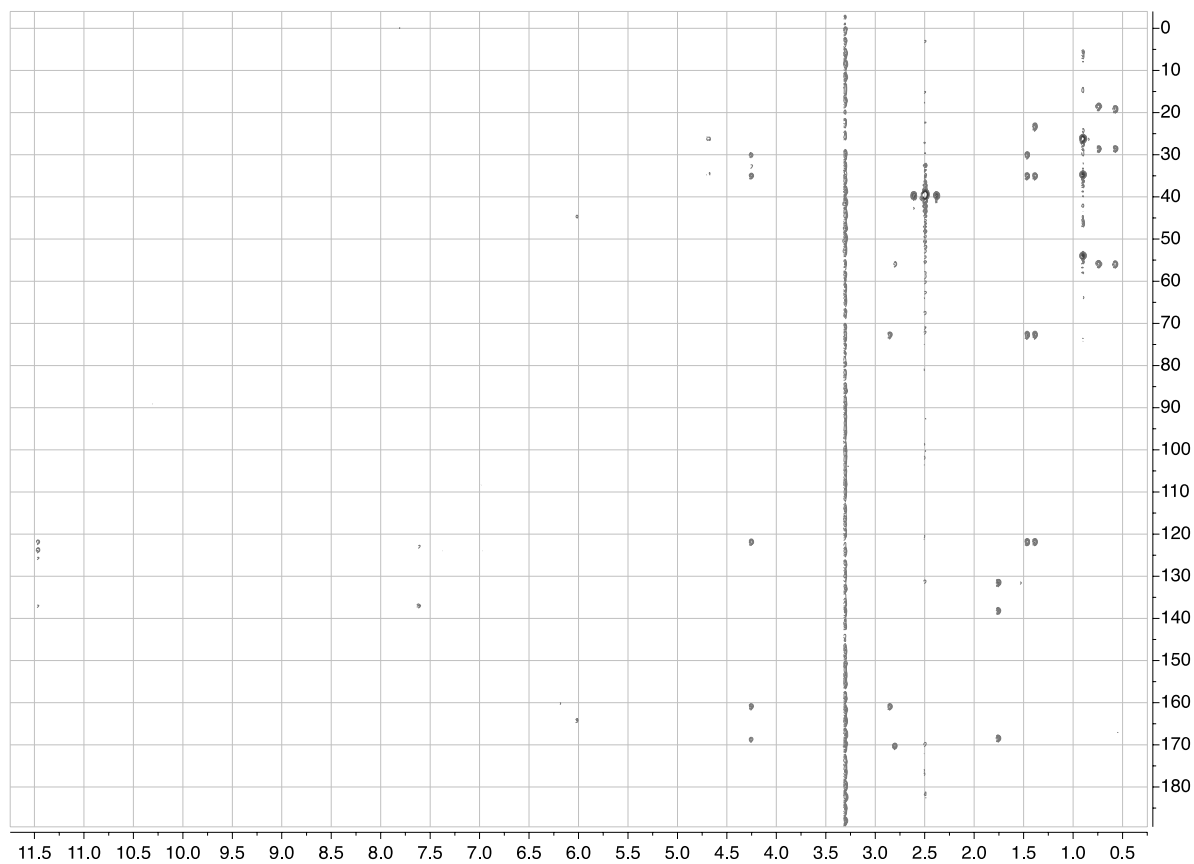**Figure S10.** gCOSY Spectrum for milnamide F (2) in DMSO- $d_6$ .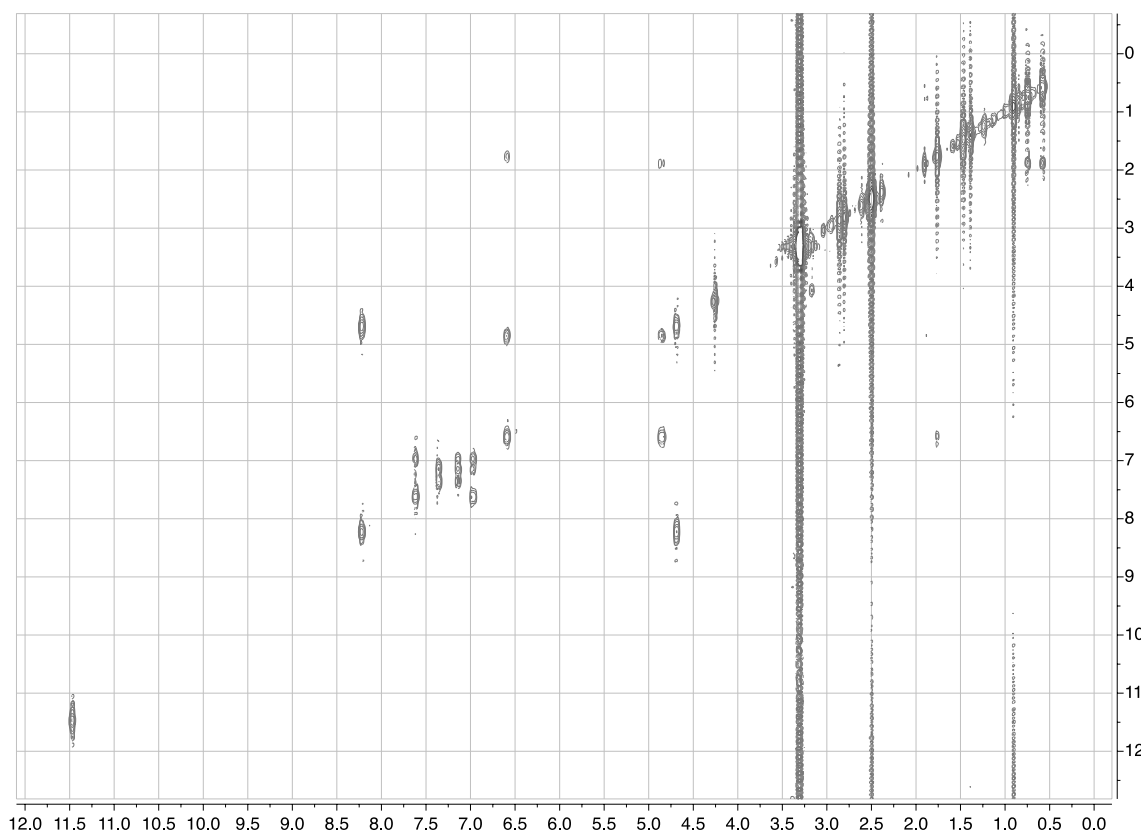

**Figure S11.** ROESY Spectrum for milnamide F (2) in DMSO- $d_6$ .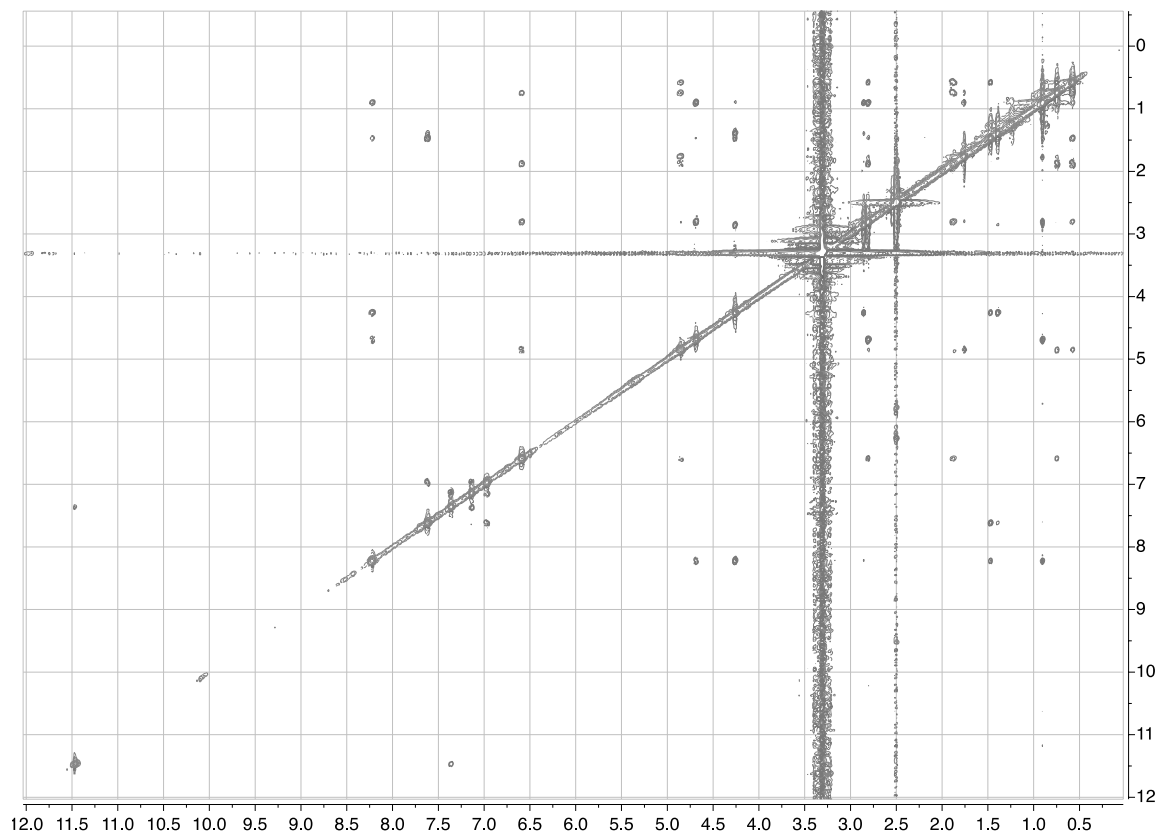**Figure S12.**  $^1\text{H}$  NMR Spectrum for milnamide G (3) in DMSO- $d_6$ .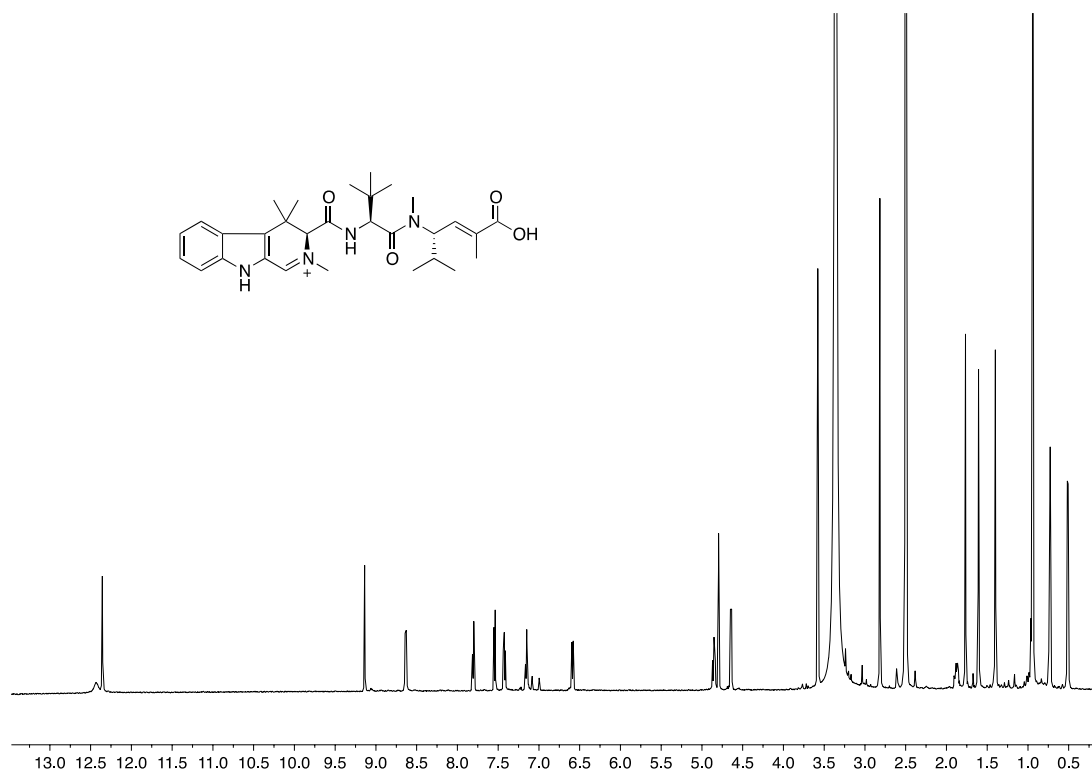

**Figure S13.** gHSQCAD Spectrum for milnamide G (3) in DMSO- $d_6$ .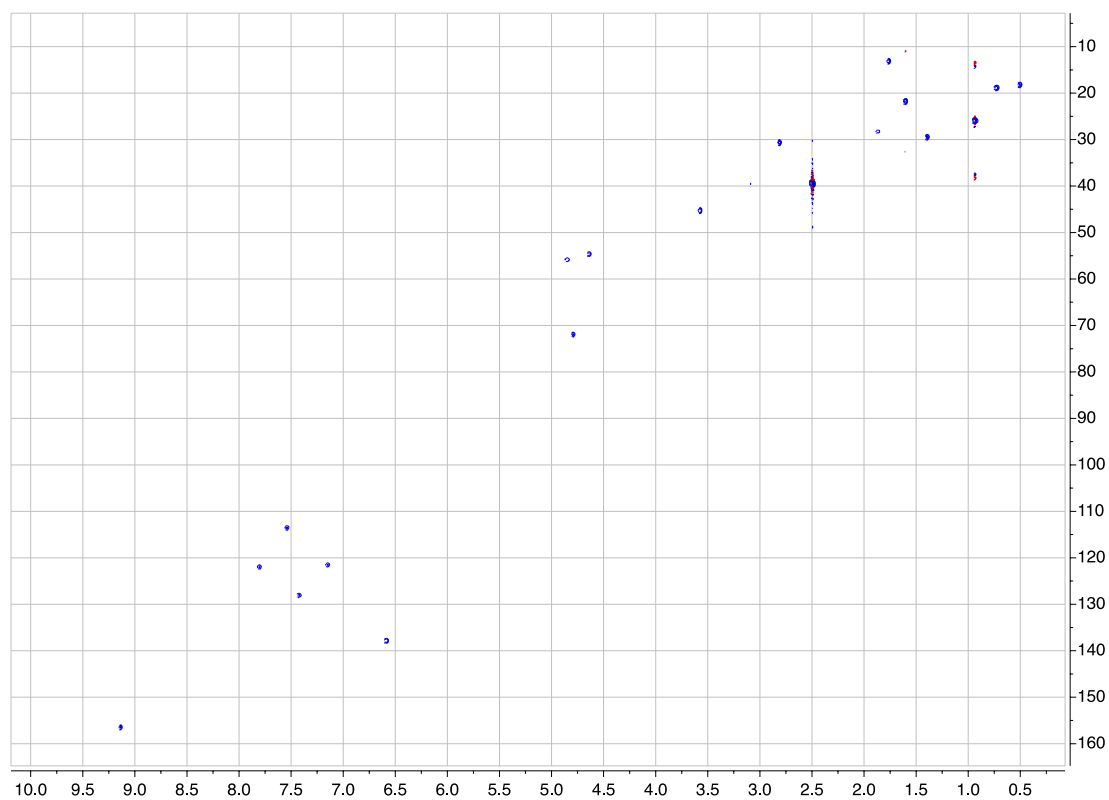**Figure S14.** gHMBCAD Spectrum for milnamide G (3) in DMSO- $d_6$ .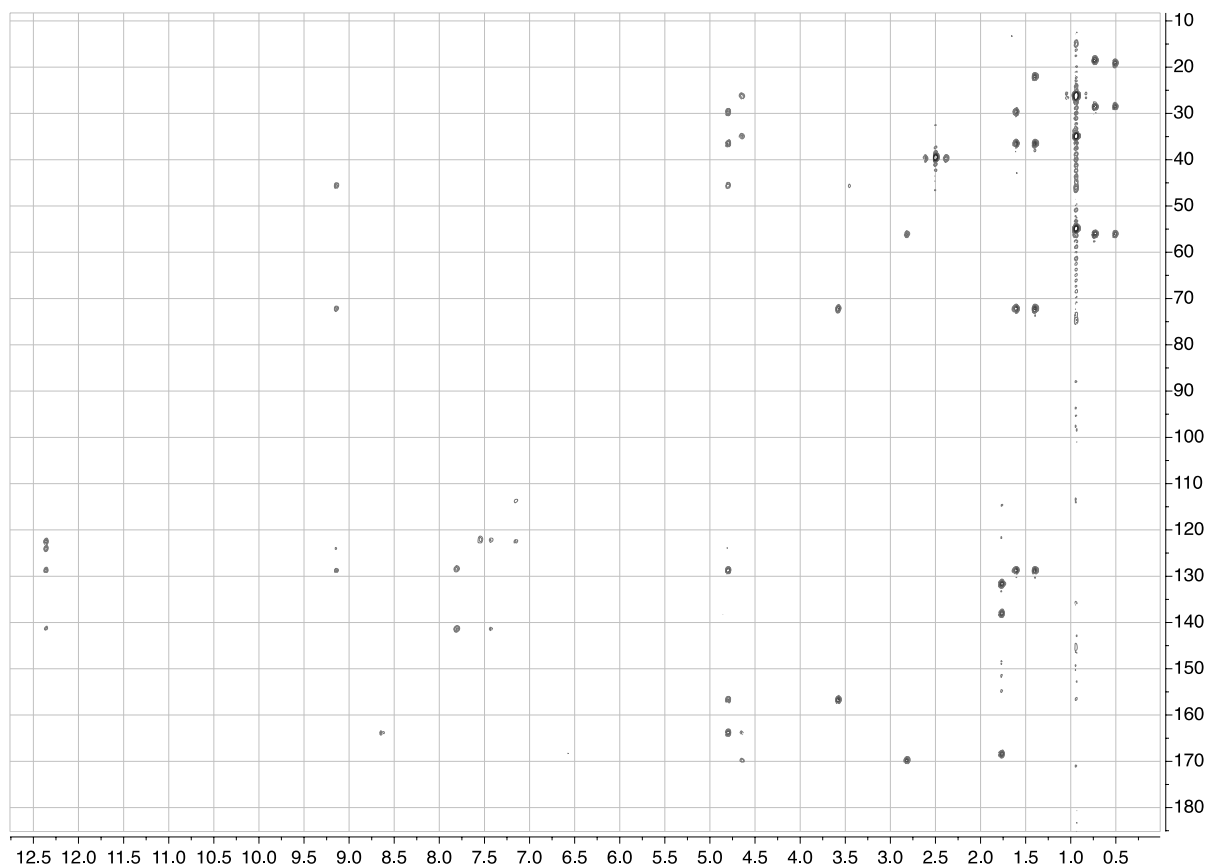



**Figure S15.** gCOSY Spectrum for milnamide G (**3**) in DMSO- $d_6$ .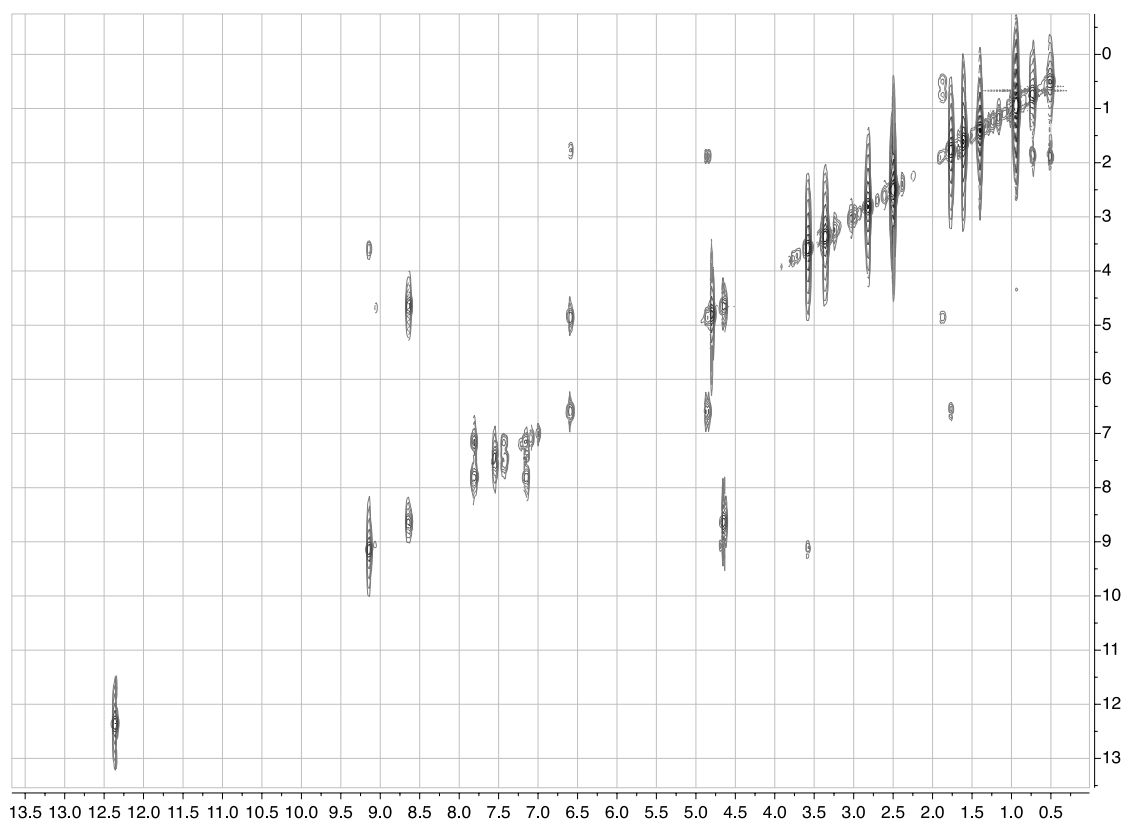**Figure S16.** ROESY Spectrum for milnamide G (**3**) in DMSO- $d_6$ .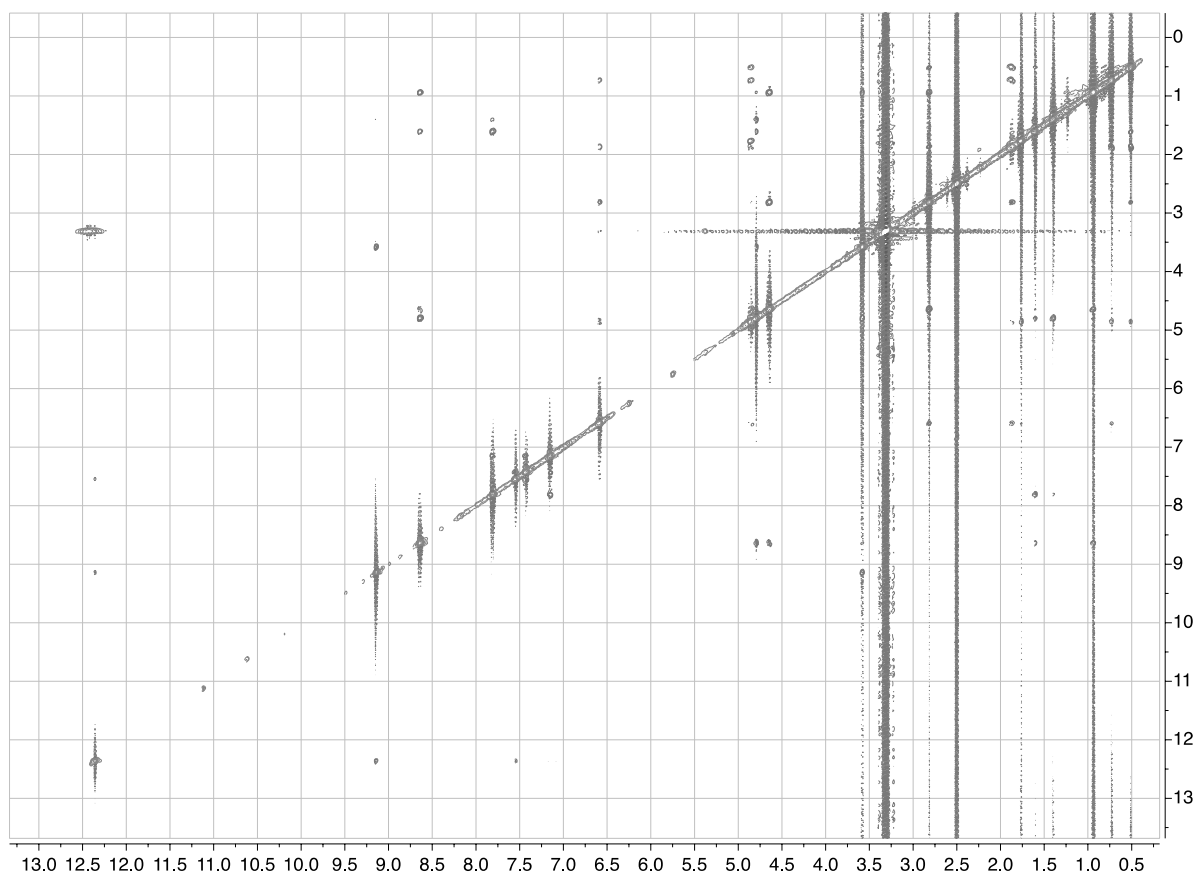

**Figure S17.**  $^1\text{H}$  NMR Spectrum for hemiasterlin D (4) in  $\text{DMSO-}d_6$ .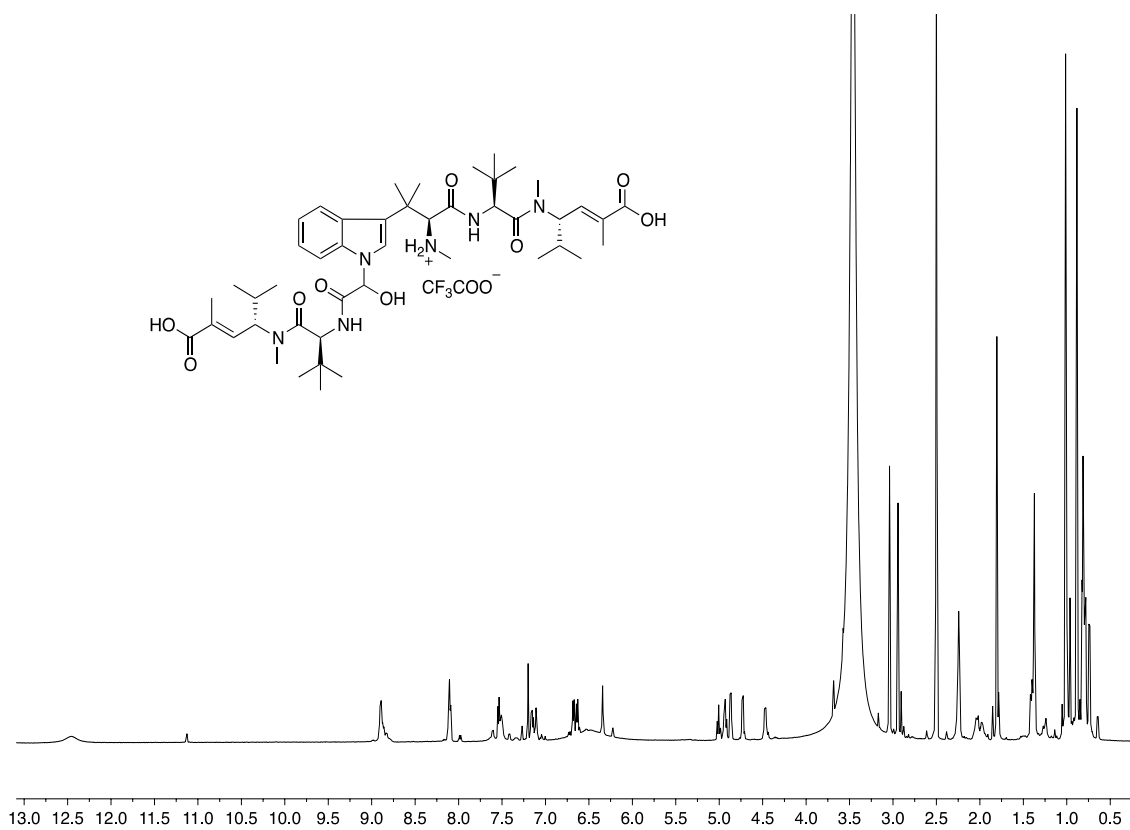**Figure S18.** gHSQCAD Spectrum for hemiasterlin D (4) in  $\text{DMSO-}d_6$ .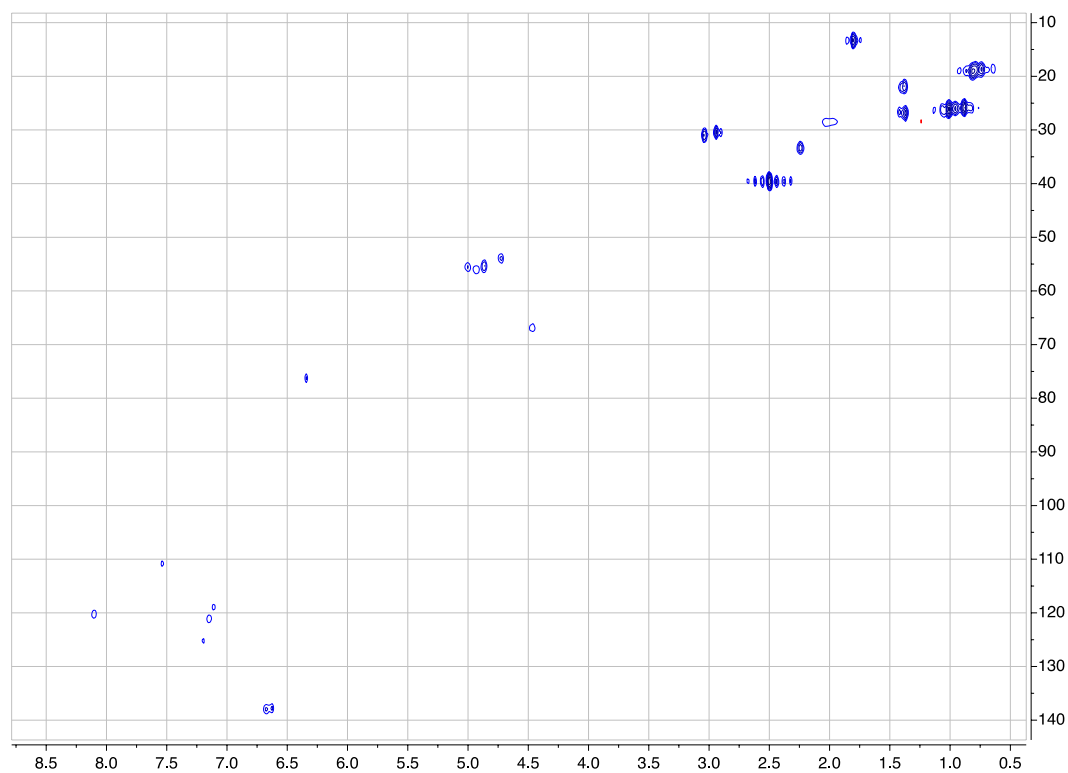

**Figure S19.** gHMBCAD Spectrum for hemiasterlin D (**4**) in DMSO-*d*<sub>6</sub>.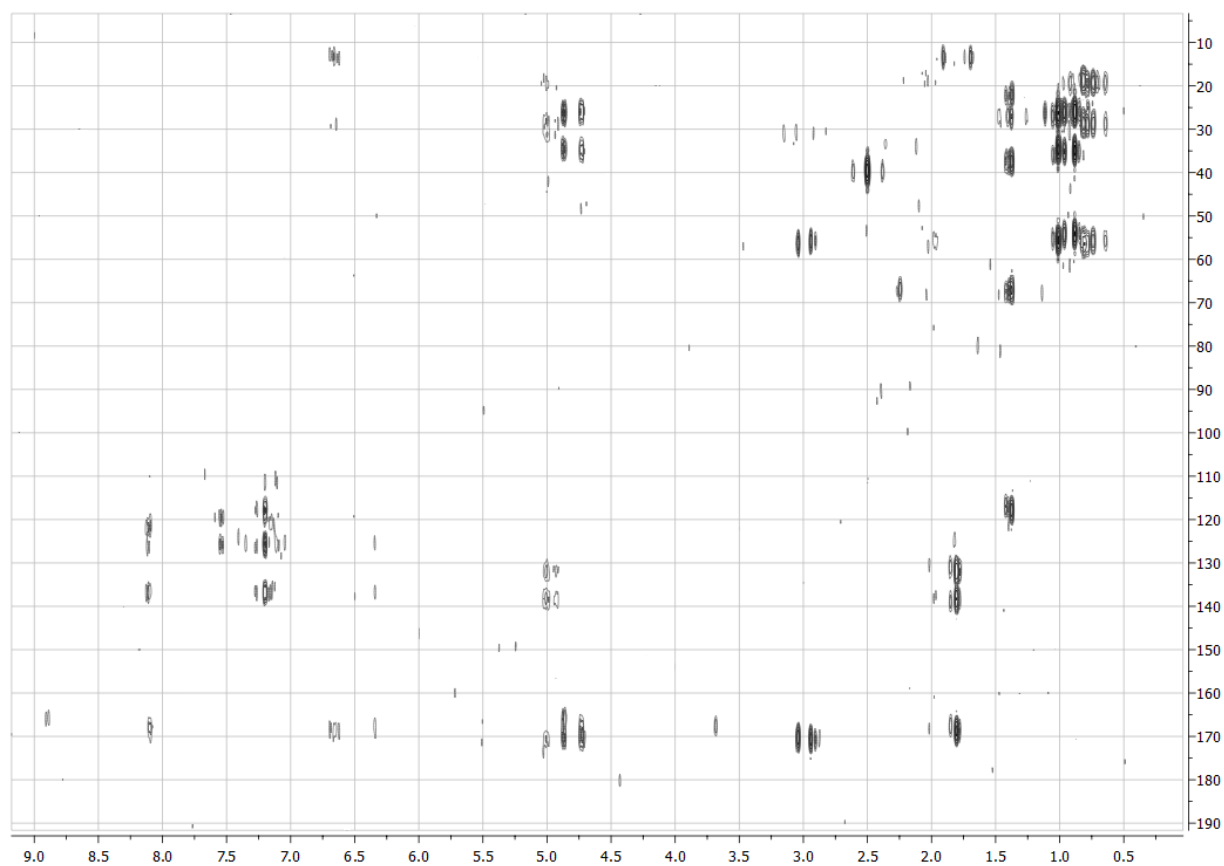**Figure S20.** gCOSY Spectrum for hemiasterlin D (**4**) in DMSO-*d*<sub>6</sub>.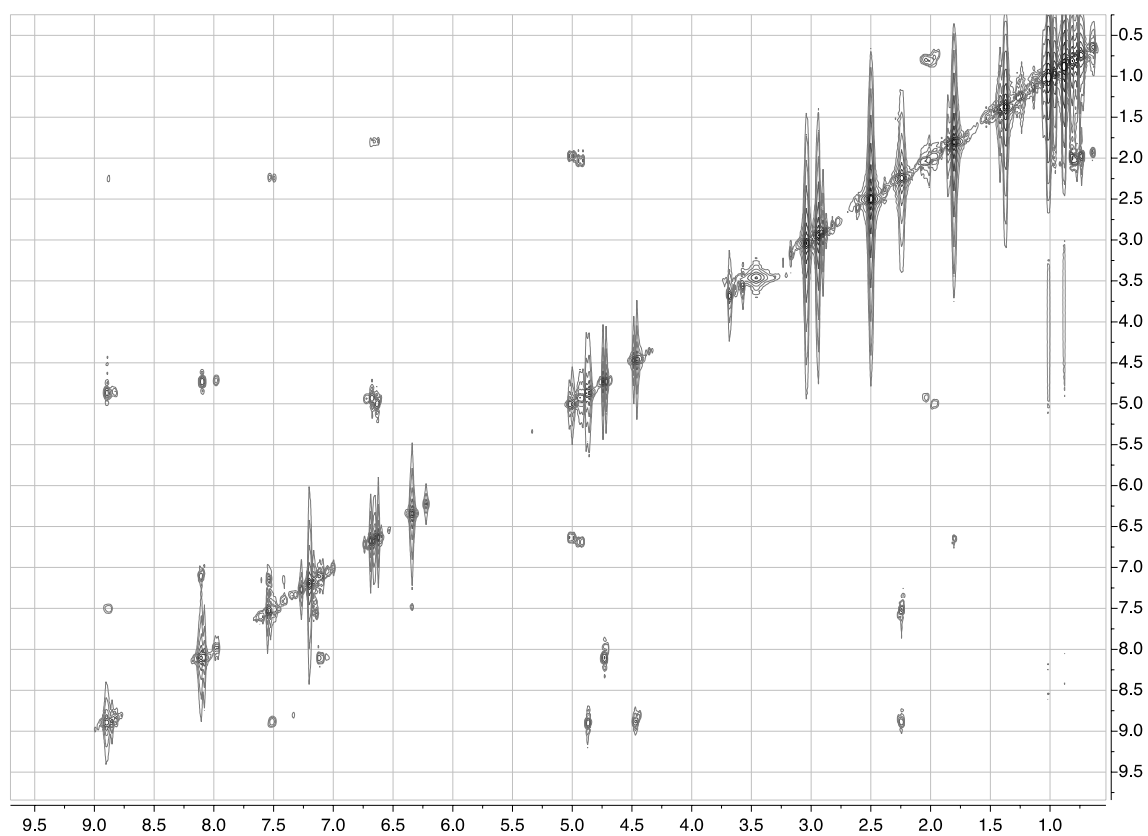

Figure S21. ROESY Spectrum for hemiasterlin D (4) in DMSO- $d_6$ .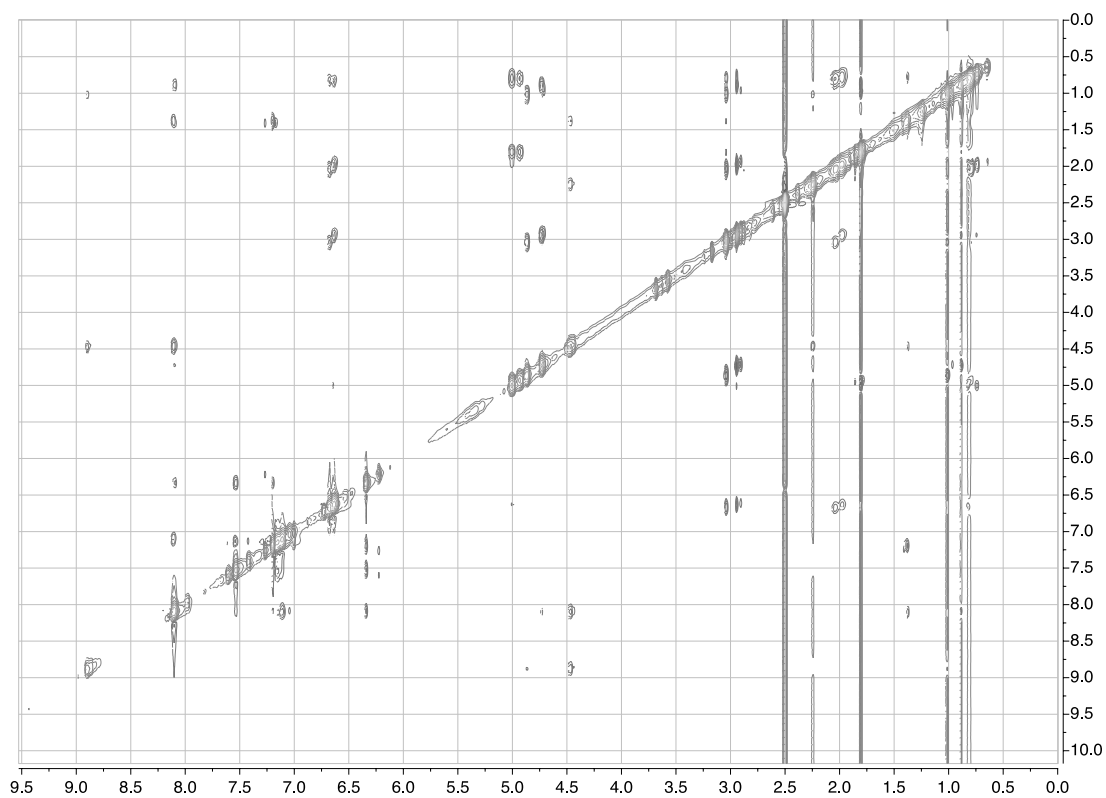

Figure S22. (+)-HRESIMS Spectrum for hemiasterlin D (4).

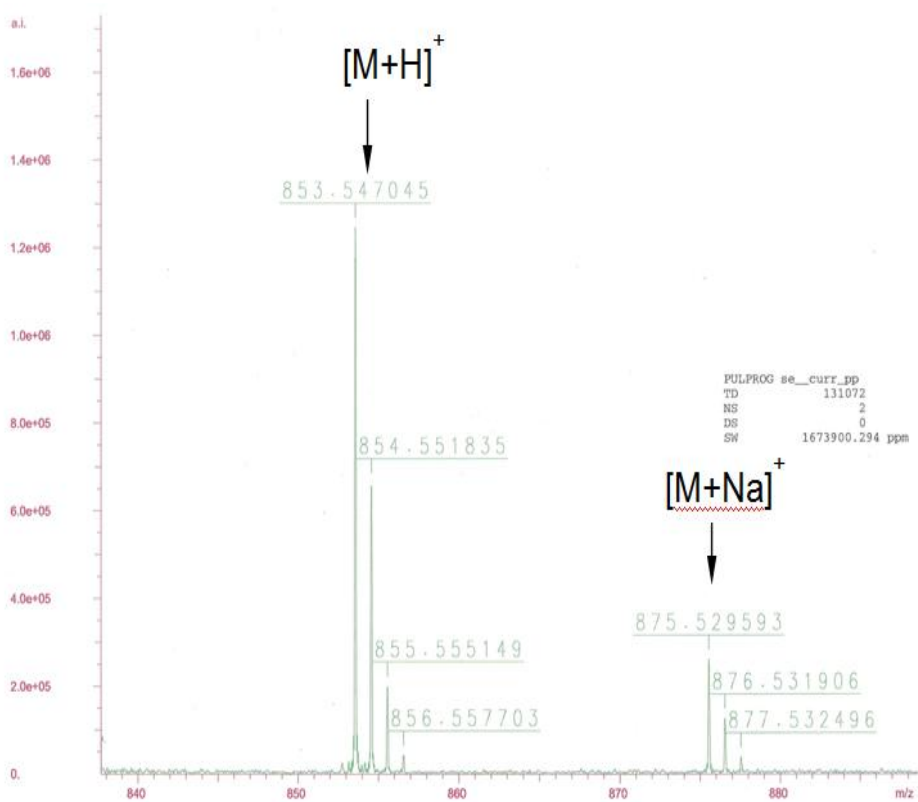

**Figure S23.** LC/MS Analysis of Marfey's Derivatives of compounds 1–4.

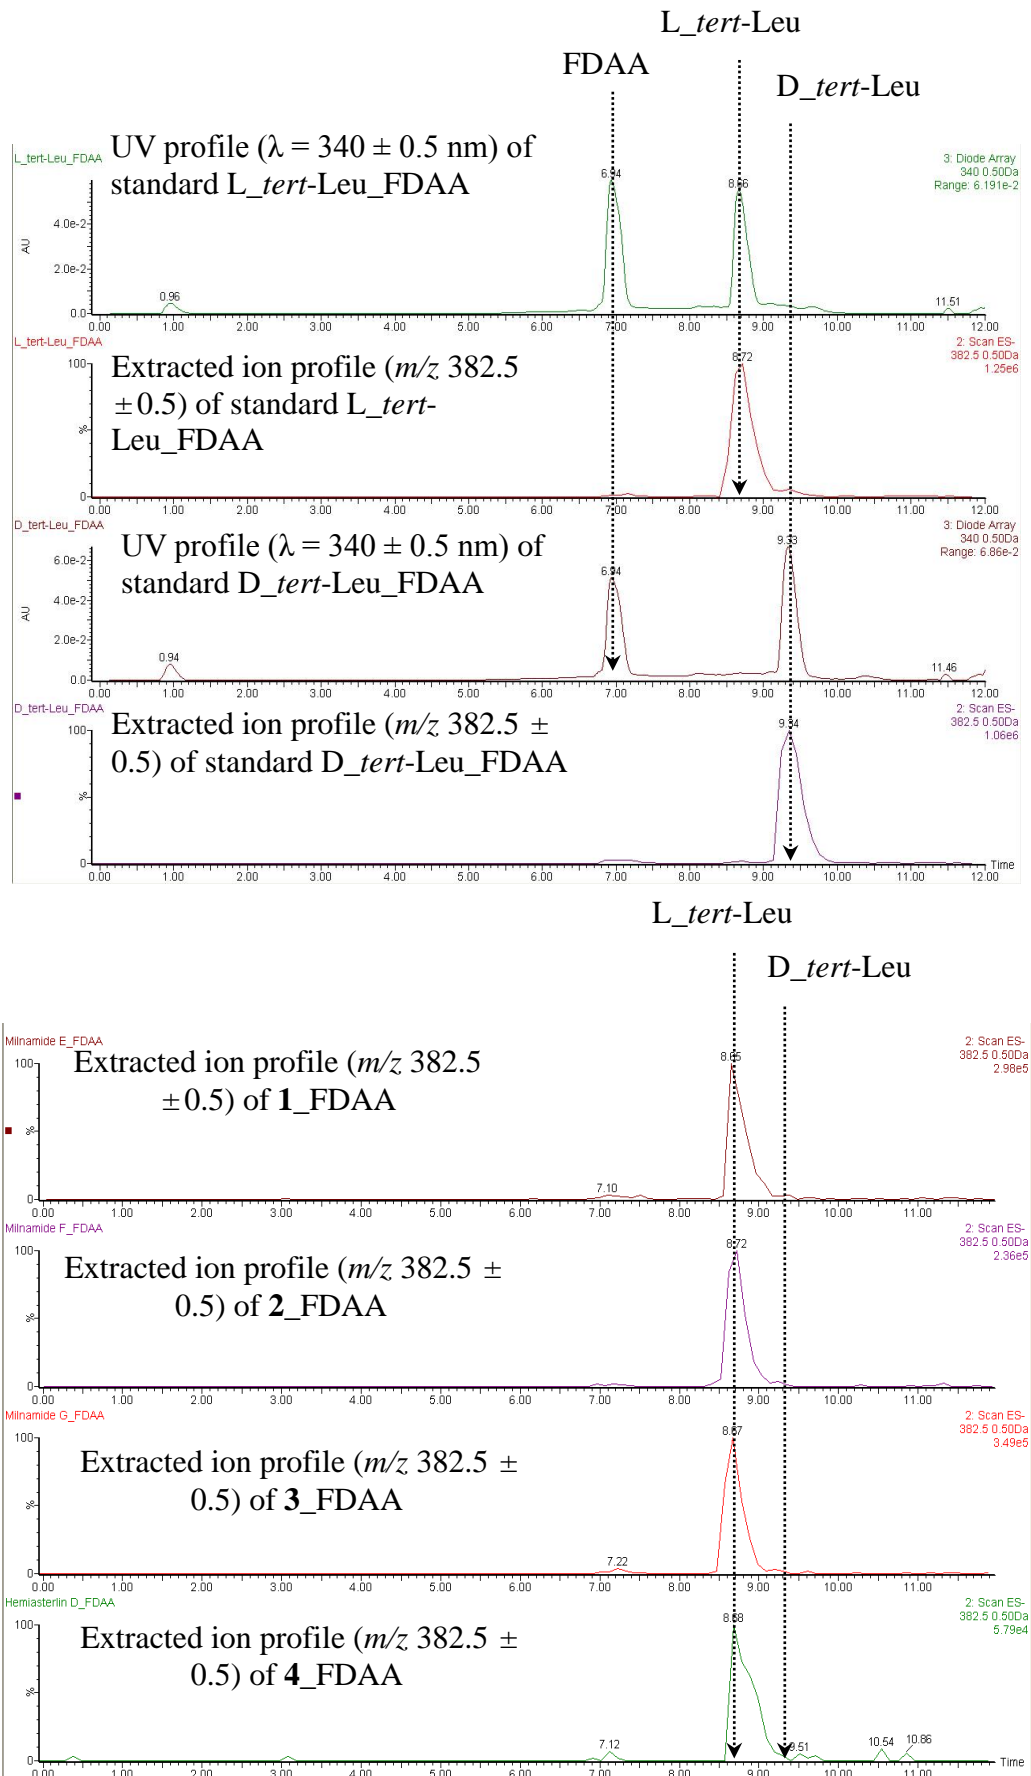

**Figure S24.** CD Spectra and Specific Rotations of Compounds 1–3 and 5–7.**CD Spectra**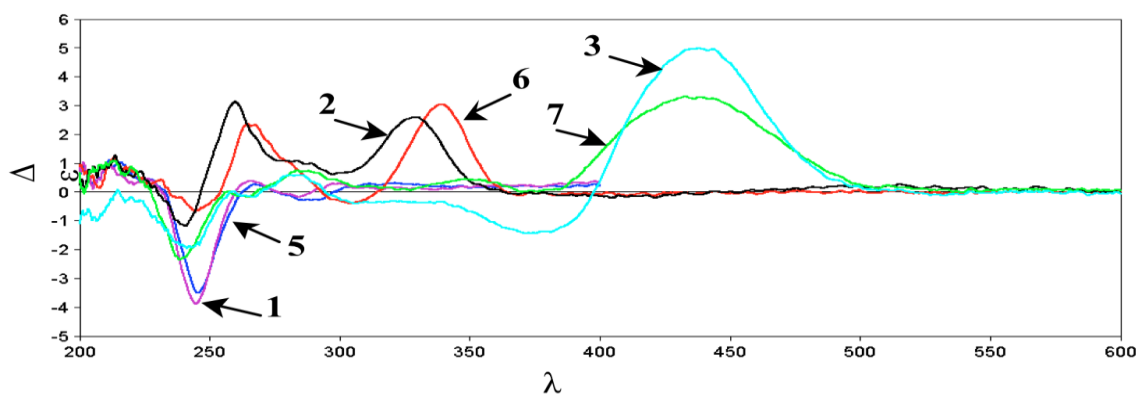**Specific Rotations**

| Compound | $[\alpha]_D^{25}$           | $[\alpha]_D$ (Reference)                                     |
|----------|-----------------------------|--------------------------------------------------------------|
| 1        | +11 ( <i>c</i> 0.02, MeOH)  |                                                              |
| 2        | +29 ( <i>c</i> 0.05, MeOH)  |                                                              |
| 3        | +134 ( <i>c</i> 0.04, MeOH) |                                                              |
| 5        | +38 ( <i>c</i> 0.02, MeOH)  | +28.8 ( <i>c</i> 0.50, CH <sub>2</sub> Cl <sub>2</sub> ) [1] |
| 6        | +49 ( <i>c</i> 0.05, MeOH)  | +68 ( <i>c</i> 0.06, MeOH) [2]                               |
| 7        | +180 ( <i>c</i> 0.06, MeOH) | +156 ( <i>c</i> 0.39, MeOH) [3]                              |

**Figure S25.** Photographs of the sponges *Pipestela candelabra*; (A) Photograph of the sponge *Pipestela candelabra* collected at Wilson Reef, Coral Sea; (B) Photograph of the sponge *Pipestela candelabra* collected at Houghton Reef, Howick Group.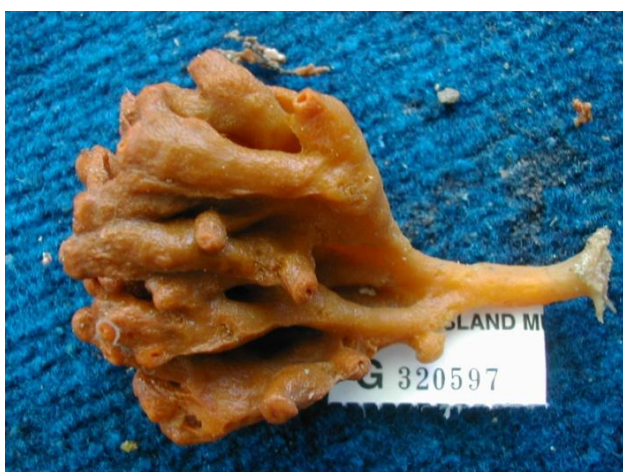

(A)

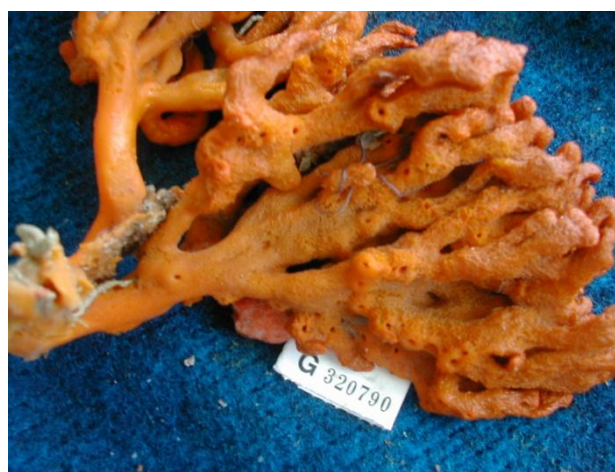

(B)

## References

1. Crews, P.; Farias, J.J.; Emrich, R.; Keifer, P.A. Milnamide A, an unusual cytotoxic tripeptide from the marine sponge *Auletta cf. constricta*. *J. Org. Chem.* **1994**, *59*, 2932–2934.
2. Sonnenschein, R.N.; Farias, J.J.; Tenney, K.; Mooberry, S.L.; Lobkovsky, E.; Clardy, J.; Crews, P. A further study of the cytotoxic constituents of a milnamide-producing sponge. *Org. Lett.* **2004**, *6*, 779–782.
3. Chevallier, C.; Richardson, A.D.; Edler, M.C.; Hamel, E.; Harper, M.K.; Ireland, C.M. A new cytotoxic and tubulin-interactive milnamide derivative from a marine sponge *Cymbastela* sp. *Org. Lett.* **2003**, *5*, 3737–3739.

© 2014 by the authors; licensee MDPI, Basel, Switzerland. This article is an open access article distributed under the terms and conditions of the Creative Commons Attribution license (<http://creativecommons.org/licenses/by/3.0/>).
